# Supplementary material for: Levels of Ycg1 Limit Condensin Function during the Cell Cycle
Source: PubMed Central journal article supplement (PMC4963108; doi:10.1371/journal.pgen.1006216), 2016-07-27
Supplement: pgen.1006216.s008.pdf [file pgen.1006216.s008.pdf]

**S1 Table. Strains list.**

| <b>Name</b> | <b>Genotype</b>                                                                                  | <b>Background</b> |
|-------------|--------------------------------------------------------------------------------------------------|-------------------|
| YBL320      | <i>MATa his3Δ leu2Δ met15Δ ura3Δ YHP1-13Myc-LEU2 YOX1-3V5-KanMx TOS4-3FLAG-Hyg HCM1-3HA-HIS3</i> | S288C             |
| YCG1-GFP    | <i>MATa ura3Δ0 leu2Δ0 his3Δ1 met15Δ0 YCG1-GFP-HIS3</i>                                           | S288C             |
| YTD33       | <i>MATa ade2-1 his3-11,15 leu2-3,112 trp1-1 ura3-1 can1-100 YCG1-3HA-HIS3</i>                    | W303              |
| YTD82       | <i>MATa ade2-1 his3-11,15 leu2-3,112 trp1-1 ura3-1 can1-100 BRN1-3HA-HIS3</i>                    | W303              |
| YTD83       | <i>MATa ade2-1 his3-11,15 leu2-3,112 trp1-1 ura3-1 can1-100 YCS4-3HA-HIS3</i>                    | W303              |
| YTD84       | <i>MATa ade2-1 his3-11,15 leu2-3,112 trp1-1 ura3-1 can1-100 SMC2-3HA-HIS3</i>                    | W303              |
| YTD80       | <i>MATa ade2-1 his3-11,15 leu2-3,112 trp1-1 ura3-1 can1-100 SMC4-3HA-HIS3</i>                    | W303              |
| YUS5        | <i>MATa leu2-3, 112 ura3, his3-11,15 CanS GAL2 pup1-T30A pre3-T20A</i>                           | W303              |
| YTD43       | <i>MATa leu2-3, 112 ura3, his3-11,15 CanS GAL2 pup1-T30A pre3-T20A YCG1-3HA-HIS3</i>             | W303              |
| YTD36       | <i>MATa ade2-1 can1-100 his3-11,15 leu2-3,112 trp1-1 ura3-1 ycg1Δ973-1035-3HA-HIS3</i>           | W303              |
| YTD184      | <i>MATa ade2-1 his3-11,15 leu2-3,112 trp1-1 ura3-1 can1-100 ycg1Δ986-1035-3HA-HIS3</i>           | W303              |
| YTD128      | <i>MATa ade2-1 his3-11,15 leu2-3,112 trp1-1 ura3-1 can1-100 ycg1Δ973-985-3HA-HIS3</i>            | W303              |
| YTD148      | <i>MATa ade2-1 his3-11,15 leu2-3,112 trp1-1 ura3-1 can1-100 ycg1-K977A-3HA-HIS3</i>              | W303              |
| YTD200      | <i>MATa ade2-1 his3-11,15 leu2-3,112 trp1-1 ura3-1 can1-100 ycg1-R976A-3HA-HIS3</i>              | W303              |
| YTD201      | <i>MATa ade2-1 his3-11,15 leu2-3,112 trp1-1 ura3-1 can1-100 ycg1-R978A-3HA-HIS3</i>              | W303              |
| YTD164      | <i>MATa ade2-1 his3-11,15 leu2-3,112 trp1-1 ura3-1 can1-100 ycg1-R980A-3HA-HIS3</i>              | W303              |
| YTD336      | <i>MATa ade2-1 his3-11,15 leu2-3,112 trp1-1 ura3-1 can1-100 Hyg-TEF1p-YCG1-3HA-HIS3</i>          | W303              |
| YTD337      | <i>MATa ade2-1 his3-11,15 leu2-3,112 trp1-1 ura3-1 can1-100 Hyg-TEF1p-BRN1-3HA-HIS3</i>          | W303              |
| YTD353      | <i>MATa ade2-1 his3-11,15 leu2-3,112 trp1-1 ura3-1 can1-100 Hyg-TEF1p-YCS4-3HA-HIS3</i>          | W303              |
| YTD349      | <i>MATa ade2-1 his3-11,15 leu2-3,112 trp1-1 ura3-1 can1-100 Hyg-TEF1p-SMC2-3HA-HIS3</i>          | W303              |
| YTD362      | <i>MATa ade2-1 his3-11,15 leu2-3,112 trp1-1 ura3-1 can1-100 Hyg-TEF1p-SMC4-3HA-HIS3</i>          | W303              |

|        |                                                                                                                                                |      |
|--------|------------------------------------------------------------------------------------------------------------------------------------------------|------|
| YTD276 | <i>MATa ade2-1 his3-11,15 leu2-3,112 trp1-1 ura3-1 can1-100 YCG1-3HA-HIS3 NatMX6-MET3p-3HA-CDC20</i>                                           | W303 |
| YTD361 | <i>MATa ade2-1 his3-11,15 leu2-3,112 trp1-1 ura3-1 can1-100 Hyg-TEF1p-YCG1-3HA-HIS3 NatMX6-MET3p-3HA-CDC20</i>                                 | W303 |
| YTD290 | <i>MATa ade2-1 his3-11,15 leu2-3,112 trp1-1 ura3-1 can1-100 ycg1-K977A-3HA-HIS3 NatMX6-MET3p-3HA-CDC20</i>                                     | W303 |
| YTD302 | <i>MATa ade2-1 his3-11,15 leu2-3,112 trp1-1 ura3-1 can1-100 Ycg1-3HA-HIS3 BRN1-3V5-kanMX6 NatMX6-MET3p-3HA-CDC20</i>                           | W303 |
| YTD355 | <i>MATa ade2-1 his3-11,15 leu2-3,112 trp1-1 ura3-1 can1-100 Hyg-TEF1p-YCG1-3HA-HIS3 BRN1-3V5-kanMX6 NatMX6-MET3p-3HA-CDC20</i>                 | W303 |
| YTD394 | <i>MATa ade2-1 his3-11,15 leu2-3,112 trp1-1 ura3-1 can1-100 Ycg1-3HA-HIS3 YCS4-3V5-kanMX6 NatMX6-MET3p-3HA-CDC20</i>                           | W303 |
| YTD395 | <i>MATa ade2-1 his3-11,15 leu2-3,112 trp1-1 ura3-1 can1-100 Hyg-TEF1p-YCG1-3HA-HIS3 YCS4-3V5-kanMX6 NatMX6-MET3p-3HA-CDC20</i>                 | W303 |
| YTD396 | <i>MATa ade2-1 his3-11,15 leu2-3,112 trp1-1 ura3-1 can1-100 Ycg1-3HA-HIS3 SMC2-3V5-kanMX6 NatMX6-MET3p-3HA-CDC20</i>                           | W303 |
| YTD397 | <i>MATa ade2-1 his3-11,15 leu2-3,112 trp1-1 ura3-1 can1-100 Hyg-TE1Fp-YCG1-3HA-HIS3 SMC2-3V5-kanMX6 NatMX6-MET3p-3HA-CDC20</i>                 | W303 |
| YTD297 | <i>MATa ade2-1 his3-11 leu2-3,112 trp1-1 ura3-1 can1-100 YCG1-3HA-HIS3 BRN1-3V5-KAN</i>                                                        | W303 |
| YTD342 | <i>MATa ade2-1 his3-11,15 leu2-3,112 trp1-1 ura3-1 can1-100 Hyg-TEFp-YCG1-HA-HIS3 BRN1-V5-KanMx6</i>                                           | W303 |
| YTD199 | <i>MATa ade2-1 his3-11,15 leu2-3,112 trp1-1 ura3-1 can1-100 ycg1-S973A S975A T979A S981A-3HA-HIS3</i>                                          | W303 |
| YTD176 | <i>MATa ade2-1 his3-11,15 leu2-3,112 trp1-1 ura3-1 can1-100 ycg1-E982A E984A-3HA-HIS3</i>                                                      | W303 |
| YTD284 | <i>MATa/MAT<math>\alpha</math> ade2/ade2 his3/his3 leu2/leu2 trp1/trp1 ura3/ura3 can1/can1 YCS4-13Myc-HIS3/YCS4</i>                            | W303 |
| YTD268 | <i>MATa/MAT<math>\alpha</math> ade2/ade2 his3/his3 leu2/leu2 trp1/trp1 ura3/ura3 can1/can1 YCG1-3V5-KanMX6/YCG1 YCS4-13Myc-HIS3/YCS4</i>       | W303 |
| YTD269 | <i>MATa/MAT<math>\alpha</math> ade2/ade2 his3/his3 leu2/leu2 trp1/trp1 ura3/ura3 can1/can1 ycg1-K977A-3V5-KanMX6/YCG1 YCS4-13Myc-HIS3/YCS4</i> | W303 |
| YTD274 | <i>MATa/MAT<math>\alpha</math> ade2/ade2 his3/his3 leu2/leu2 trp1/trp1</i>                                                                     | W303 |

|        |                                                                                                                                                                                          |       |
|--------|------------------------------------------------------------------------------------------------------------------------------------------------------------------------------------------|-------|
|        | <i>ura3/ura3 can1/can1 SMC2-13Myc-HIS3/SMC2</i>                                                                                                                                          |       |
| YTD285 | <i>MATa/MAT<math>\alpha</math> ade2/ade2 his3/his3 leu2/leu2 trp1/trp1 ura3/ura3 can1/can1 YCG1-3V5-KanMX6/YCG1 SMC2-13Myc-HIS3/SMC2</i>                                                 | W303  |
| YTD267 | <i>MATa/MAT<math>\alpha</math> ade2/ade2 his3/his3 leu2/leu2 trp1/trp1 ura3/ura3 can1/can1 ycg1-K977A-3V5-KanMX6/YCG1 SMC2-13Myc-HIS3/SMC2</i>                                           | W303  |
| YTD275 | <i>MATa/MAT<math>\alpha</math> ade2/ade2 his3/his3 leu2/leu2 trp1/trp1 ura3/ura3 can1/can1 SMC4-13Myc-HIS3/SMC4</i>                                                                      | W303  |
| YTD286 | <i>MATa/MAT<math>\alpha</math> ade2/ade2 his3/his3 leu2/leu2 trp1/trp1 ura3/ura3 can1/can1 YCG1-3V5-KanMX6/YCG1 SMC4-13Myc-HIS3/SMC4</i>                                                 | W303  |
| YTD255 | <i>MATa/MAT<math>\alpha</math> ade2/ade2 his3/his3 leu2/leu2 trp1/trp1 ura3/ura3 can1/can1 ycg1-K977A-3V5-KanMX6 SMC4-13Myc-HIS3</i>                                                     | W303  |
| JS306  | <i>MATa his3<math>\Delta</math>200 leu2<math>\Delta</math>1 met15<math>\Delta</math>0 trp1<math>\Delta</math>63 ura3-167 RDN1::Ty1-MET15, mURA3/HIS3</i>                                 |       |
| JS576  | <i>MATa his3<math>\Delta</math>200 leu2<math>\Delta</math>1 met15<math>\Delta</math>0 trp1<math>\Delta</math>63 ura3-167 RDN1::Ty1-MET15, mURA3/HIS3 sir2<math>\Delta</math>::KanMX4</i> |       |
| YHA212 | <i>MATa his3<math>\Delta</math>200 leu2<math>\Delta</math>1 met15<math>\Delta</math>0 trp1<math>\Delta</math>63 ura3-167 RDN1::Ty1-MET15, mURA3/HIS3 YCG1-3HA-HIS3</i>                   |       |
| YHA214 | <i>MATa his3<math>\Delta</math>200 leu2<math>\Delta</math>1 met15<math>\Delta</math>0 trp1<math>\Delta</math>63 ura3-167 RDN1::Ty1-MET15, mURA3/HIS3 ycg1-K977A-3HA-HIS3</i>             |       |
| YHA215 | <i>MATa his3<math>\Delta</math>200 leu2<math>\Delta</math>1 met15<math>\Delta</math>0 trp1<math>\Delta</math>63 ura3-167 RDN1::Ty1-MET15, mURA3/HIS3 Hyg-TEF1p-YCG1-3HA-HIS3</i>         |       |
| YTD430 | <i>MATa ade2-1 his3-11,15 leu2-3,112 trp1-1 ura3-1 can1-100 ycg1-K977A-3HA-HIS3 YCG1-3HA::URA3</i>                                                                                       | W303  |
| MW836a | <i>MATa ura3<math>\Delta</math>0 leu2<math>\Delta</math>0 his3<math>\Delta</math>1 met15<math>\Delta</math>0</i>                                                                         | S288C |
| Y10100 | <i>MATa ura3<math>\Delta</math>0 leu2<math>\Delta</math>0 his3<math>\Delta</math>1 met15<math>\Delta</math>0 ycg1-2::KanMX6</i>                                                          | S288C |
| Y9804  | <i>MATa ura3<math>\Delta</math>0 leu2<math>\Delta</math>0 his3<math>\Delta</math>1 met15<math>\Delta</math>0 brn1-9::KanMX6</i>                                                          | S288C |
| YJB653 | <i>MATa ade2-1 his3-11 leu2-3,112 trp1-1 ura3-1 can1-100 YCG1-3HA-HIS3 NET1-3V5-KAN</i>                                                                                                  | W303  |
| YJB651 | <i>MATa ade2-1 his3-11,15 leu2-3,112 trp1-1 ura3-1 can1-100 Hyg-TEFp-YCG1-HA-HIS3 NET1-V5-KanMx6</i>                                                                                     | W303  |
