# Supplementary material for: Levels of Ycg1 Limit Condensin Function during the Cell Cycle
Source: PubMed Central journal article supplement (PMC4963108; doi:10.1371/journal.pgen.1006216), 2016-07-27
Supplement: pgen.1006216.s009.pdf [file pgen.1006216.s009.pdf]

**S2 Table. qPCR primer list.**

| <b>Primer</b> | <b>Location</b>                            | <b>Sequence</b>         | <b>Reference</b>                                   |
|---------------|--------------------------------------------|-------------------------|----------------------------------------------------|
| CEN5DZF       | Condensin-depleted region in SEC3 on Chr V | TTTCCTCTCCTCCTGCTTTATTC | this study                                         |
| CEN5DZR       | Condensin-depleted region in SEC3 on Chr V | GAGGCTGAACTGAGACGATTAG  | this study                                         |
| rDNA9-F       | rDNA, intergenic spacer 1                  | AGCCTACTCGAATTCGTTTCC   | Clemente-Blanco et al, <i>Nat Cell Biol</i> , 2011 |
| rDNA9-R       | rDNA, intergenic spacer 1                  | ATAGTGAGGAACTGGGTTACC   | Clemente-Blanco et al, <i>Nat Cell Biol</i> , 2011 |
| CEN4-F        | Chr IV centromere                          | CCGAGGCTTTCATAGCTTA     | Bizzari and Marston, <i>J Cell Biol</i> , 2011     |
| CEN4-R        | Chr IV centromere                          | ACCGGAAGGAAGAATAAGAA    | Bizzari and Marston, <i>J Cell Biol</i> , 2011     |
| CEN12-F       | Chr XII centromere                         | CTTTACGCGGGTGTGTA       | this study                                         |
| CEN12-R       | Chr XII centromere                         | CAACCAA                 | this study                                         |
| Tel0.6F       | Chr VI telomere, right arm                 | CAGGCAGTCCTTTCTATTTTC   | Hoppe et al, <i>Mol Cell Biol</i> , 2002           |
| Tel0.6R       | Chr VI telomere, right arm                 | GCTTGTTAACTCTCCGACAG    | Hoppe et al, <i>Mol Cell Biol</i> , 2002           |
